# Supplementary material
Source: publisher figshare collection journal article supplement (https://sage.figshare.com/ndownloader/files/14145008)
Supplement: Supplementary file 1 [file 14145008]

## Supplementary File 1: Keywords for coding

| Variable name                 | Keyword search                                                                                                                                                                                                                                                                                                                                                                                                                                                                                                                                                                                                                                                                                                                                                                                                                                                                                                                                                                                                                                                                                                                                                                                                                                                                               |
|-------------------------------|----------------------------------------------------------------------------------------------------------------------------------------------------------------------------------------------------------------------------------------------------------------------------------------------------------------------------------------------------------------------------------------------------------------------------------------------------------------------------------------------------------------------------------------------------------------------------------------------------------------------------------------------------------------------------------------------------------------------------------------------------------------------------------------------------------------------------------------------------------------------------------------------------------------------------------------------------------------------------------------------------------------------------------------------------------------------------------------------------------------------------------------------------------------------------------------------------------------------------------------------------------------------------------------------|
| COMPANY                       | <p>A. Menarini Australia Pty Ltd; Abbott Australasia Pty Ltd/AbbVie Pty Ltd; Actelion Pharmaceuticals Australia Pty Ltd; Allergan Australia Pty Ltd; Amgen Australia; Astellas Pharma Australia Pty Ltd; Astrazeneca Pty Ltd; Bayer Australia Ltd; Biogen Idec Australia Pty Limited; Boehringer Ingelheim Pty Limited; Bristol-Myers Squibb Australia Pty Limited; Celgene Pty Ltd; CSL (includes bioCSL (Australia) Pty Ltd and CSL Behring and Seqirus); Eisai Australia Pty Ltd; Eli Lilly Australia Pty Ltd; Gilead Sciences Pty.; GlaxoSmithKline Australia Pty Ltd; IPSEN Pty Ltd; Janssen; Lundbeck Australia; Merck Serono Australia Pty Ltd; MSD Australia Pty Ltd; Mundipharma Pty Ltd; Mylan EPD; Norgine Pty Limited; Novartis Pharmaceuticals Australia Pty Limited (includes also Alcon Laboratories); Novo Nordisk Pharmaceuticals; Pfizer Australia; Roche Products Pty Limited; Sanofi/Sanofi Aventis Australia Pty Ltd; Servier Laboratories Pty Ltd; Shire Australia; Takeda Pharmaceuticals Australia Pty Ltd (includes also Nycomed Pty Ltd Report); UCB Pharma</p>                                                                                                                                                                                                    |
| HEALTH CONSUMER ORGANISATIONS | <p>ACCESS Australia Disability; ACCESS Australia Infertility; ADDults with ADHD NSW Inc; Aftercare; Aids Council of NSW (ACON); ALA Chronic Liver Disease Faculty; Alpha 1 Association of Australia; Alzheimer's Australia; Alzheimer's Australia NSW; Amanda Young Foundation (AYF); Arrhythmia Alliance ; Arthritis And Osteoporosis Foundation Western Australia; Arthritis and Osteoporosis NSW; Arthritis and Osteoporosis Victoria; Arthritis Australia; Arthritis Queensland incorporating Osteoporosis Queensland; Arthritis South Australia; AS Victoria; Asbestosis &amp; Mesothelioma Association Australia; Asthma Australia; Asthma Foundation Queensland; Asthma Victoria; Australasian Hepatology Association; Australasian Paediatric Endocrine Group; Australasian Society for HIV; Viral Hepatitis and Sexual Health Medicine (ASHM); Australasian Society of Inborn Errors of Metabolism; Australia and New Zealand Burns Association; Australian &amp; New Zealand Bone &amp; Mineral Society (ANZBMS); Australian Atherosclerosis Society; Australian Cervical Cancer Foundation; Australian Diabetes Educators Association; Australian Federation of AIDS Organisations; Australian Haemophilia Centre Directors Organisation; Australian Herpes Management Forum;</p> |

Australian Injecting and Illicit Drug Users League; Australian Pain Management Association; Australian Pain Society; Australian Pituitary Foundation; Australian Pompe Association; Australian Thyroid Foundation; Australian Transplant Games; Baker IDI Heart and Diabetes Institute; BEB (Benign Essential Blepharospasm) Western Australian Support Group Inc.; Bobby Goldsmith Foundation; Bowel Cancer Australia; Brain Tumour Alliance Australia; Breast Cancer Network Australia; Camp Quality; Cancer Australia; Cancer Council Australia; Cancer Council NSW; Cancer Council Victoria; Cancer Council Western Australia; CanSpeak; CanTeen; CanToo Organisation; Carers Australia; Centre for Community - Driven Research; Cherish Women's Foundation; Chronic Pain Association of Australia; Connery Communications; CREAKY JOINTS AUSTRALIA (Global Healthy Living Foundation); Crohn's & Colitis Australia; Cure Our Kids; Cystic Fibrosis Australia; Danni Meads-Barlow Foundation; Day of Difference; Diabetes Australia; Diabetes NSW; Diabetes Queensland; Diabetes Tasmania; Diabetes Victoria; Diabetes WA; Dialysis Escape Line Australia; Donate Life; Epilepsy Action Australia; Epilepsy Association of South Australia and Northern Territory; Epilepsy Australia; Epilepsy Foundation; Epilepsy Queensland; Fabry Australia; FH (Familial hypercholesterolemia) Australasia Network; Foundation 49: Men's Health; Genetic Alliance Australia; Genetic Support Network of Victoria; GI Cancer Institute; Glaucoma Australia; HAE Australasia; Haemophilia Foundation Australia; Haemophilia Foundation of New Zealand; Health Consumer Advocacy (HCA) ; Heart Support Australia; HeartKids Australia; HeartKids NSW Inc; Heartkids SA; Hearts4Heart; Hepatitis Australia; Hepatitis NSW; Hepatitis Queensland; Hepatitis Victoria; HOPE for Cambodian Children; IBD Support Australia; Immune Deficiencies Foundation of Australia; Impotence Australia; Inflammatory Bowel Disease Clinic; Jean Hailes for Women's Health; John Logan Cancer Treatment Foundation; Juvenile Diabetes Research Foundation (JDRF); Kidney Health Australia; Kidney Kids SA; Kids Cancer Project; Kookaburra Kids Foundation; Leukaemia Foundation; Liver Foundation of Western Australia; Living Positive Victoria; Lung Foundation Australia; Lymphoma Australia; Lysosomal Diseases New Zealand; Macular Disease Foundation Australia; McGrath Foundation; Melanoma Institute Australia; Melanoma Patients Australia; Melanoma Tasmania; MelanomaWA; Meningitis Centre Australia; Meningococcal Australia; Mental Health

Australia; Mental Illness Fellowship of Australia; Metabolic Dietary Disorders Association (MDDA); Motor Neurone Disease Australia; Movement Disorder Society of Australia; MPS Australia; MS ANGELS BRISBANE; MS Australia; MS Queensland; MS Research Australia; MS Society of SA & NT ; MSWA; Multiple Sclerosis Limited; Myeloma Australia; National Association of People with HIV Australia (NAPWHA); National Asthma Council Australia; National Heart Foundation; National Stroke Foundation; New Zealand Pain Society; Nexus Australiasia Pty Ltd; Northcott Disability Services; NSW Heart Foundation; Osteoporosis Australia; Ovarian Cancer Australia; Paceline; Painaustralia; Palliative Care QLD; Palliative Care WA; Pancare Foundation; Parkinson's Australia; Parkinson's NSW; Parkinson's Queensland; Parkinson's SA; Parkinson's Victoria; Parkinson's Western Australia; Polio Australia; Prader-Willi Syndrome Association of Victoria; Prostate Cancer Foundation of Australia; Psoriasis Australia; Pulmonary Hypertension Association of Australia; Queensland Positive People Inc; Rare Cancers Australia; Rare Voices Australia; Redkite; SANE Australia; Save the Children; Schizophrenia Fellowship NSW; Schizophrenia Fellowship of Australia; Scleroderma Association of NSW Inc; Scleroderma Australia; Sight For All; Skin & Cancer Foundation Inc; SMILE Foundation; Sunflower Foundation; Sydney Breast Cancer Foundation; Sydney Children's Hospital Foundation - Future Fertility Centre; Thalassaemia Australia; Thalassaemia Society of NSW; The Australian Dystonia Support Group; The Gut Foundation; The Inflammatory Neuropathy Support Group of Victoria Inc.; The Myositis Association Australia; Think Pink Foundation; Tour de Cure; Transplant Australia; Tuberos Sclerosis Australia; Turner Syndrome Association of Australia; Unicorn Foundation; Variety - the Children's Charity; Vision2020 Australia; Western Australia AIDS Council; Youth Empowerment Against HIV/AIDS; ZEST Health Strategies; Allergy & Anaphylaxis Australia; AusPIPS; Australian and New Zealand Urogenital and Prostate Cancer Trials Group (ANZUP); Australian Mitochondrial Disease Foundation (AMDF); Australian Pain Relief Association (APRA); Australian Scleroderma Interest Group; Beard Season; CAH Support Group; Cancer Drugs Alliance; Crohn's Colitis Cure; Dragon Abreast Australia; Dragon Claw; Epilepsy WA; HepatitisWA; Juvenile Arthritis Fundraiser; Leukaemia Foundation (SA/NT branch); Man Up!; Movember Foundation; Parenteral Nutrition Down Under; Parkinson's ACT; Pink Hope Community; Positive

|                                                                                                                                                                                                                                                                                              |                                                                                                                                                                                                                                                             |
|----------------------------------------------------------------------------------------------------------------------------------------------------------------------------------------------------------------------------------------------------------------------------------------------|-------------------------------------------------------------------------------------------------------------------------------------------------------------------------------------------------------------------------------------------------------------|
|                                                                                                                                                                                                                                                                                              | Life NSW; Shake It Up Australia Foundation; Trish MS Research Foundation; Pulmonary Hypertension Society of Australia and New Zealand; Hepatitis SA; Lung Cancer Central; Pancreatic Cancer Support Australia; Children's Cancer Council; Unspecified (n=5) |
| <b>PURPOSE OF SUPPORT</b> (We manually checked data on "purpose of support" to exclude events in which a descriptive term such as "research", "advocacy", "information", "awareness" had been used to describe the consumer organisation's mission and not the aims of company sponsorship). |                                                                                                                                                                                                                                                             |
| Information/Information materials                                                                                                                                                                                                                                                            | information; material; printing; production; editing; resource; publication; report; fact sheet; newsletter; booklet; ebook; handbook; brochure; telephone; video; website; tool; social media; hub; patient support app; channel                           |
| Meetings                                                                                                                                                                                                                                                                                     | conference; summit; workshop; roundtable; round-table; congress; symposium; symposia; seminar; meeting; briefing; forum; webinar                                                                                                                            |
| Education and training                                                                                                                                                                                                                                                                       | educat; training; course; information day; professional development                                                                                                                                                                                         |
| Disease awareness campaigns                                                                                                                                                                                                                                                                  | awareness; campaign                                                                                                                                                                                                                                         |
| Projects/programs                                                                                                                                                                                                                                                                            | project; program                                                                                                                                                                                                                                            |
| Fundraising events                                                                                                                                                                                                                                                                           | ball; walk; fundrais; ride; dinner; morning tea; lunch; charitable; pedal                                                                                                                                                                                   |
| Research                                                                                                                                                                                                                                                                                     | research; survey; registry; database                                                                                                                                                                                                                        |
| Advocacy                                                                                                                                                                                                                                                                                     | advoc; advocate; parliament                                                                                                                                                                                                                                 |
| Travel                                                                                                                                                                                                                                                                                       | travel; accommodation; flight; airfare                                                                                                                                                                                                                      |
| Unrestricted                                                                                                                                                                                                                                                                                 | unrestricted                                                                                                                                                                                                                                                |
| Exhibitions                                                                                                                                                                                                                                                                                  | exhibition; booth; expo                                                                                                                                                                                                                                     |
| Guidelines                                                                                                                                                                                                                                                                                   | guideline; [national] strategy; national plan                                                                                                                                                                                                               |
| Miscellaneous                                                                                                                                                                                                                                                                                |                                                                                                                                                                                                                                                             |
| <b>FORM OF SUPPORT</b>                                                                                                                                                                                                                                                                       |                                                                                                                                                                                                                                                             |
| Financial support                                                                                                                                                                                                                                                                            |                                                                                                                                                                                                                                                             |
| In-kind support                                                                                                                                                                                                                                                                              | Volunteering staff; practical support; partnership; share booth space; distribution of health care professionals; non-financial support                                                                                                                     |
| Product donation                                                                                                                                                                                                                                                                             | Product donation; non-monetary support                                                                                                                                                                                                                      |
| <b>CLINICAL AREAS OF CONSUMER GROUPS</b>                                                                                                                                                                                                                                                     |                                                                                                                                                                                                                                                             |
| <b>Broader areas</b>                                                                                                                                                                                                                                                                         | <b>Narrow areas</b>                                                                                                                                                                                                                                         |
| Allergy and anaphylaxis                                                                                                                                                                                                                                                                      |                                                                                                                                                                                                                                                             |
| Blood disorders                                                                                                                                                                                                                                                                              | haemophilia and other inherited bleeding disorder; thalassaemia; sickle cell anaemia; blackfan diamond disorder; haemophilia                                                                                                                                |
| Cancer                                                                                                                                                                                                                                                                                       | rare and less common cancers; cancer; leukaemia; lymphoma; myeloma and related blood disorders; melanoma; lymphoma;                                                                                                                                         |

|                                    |                                                                                                                                                                                                                                                                                                           |
|------------------------------------|-----------------------------------------------------------------------------------------------------------------------------------------------------------------------------------------------------------------------------------------------------------------------------------------------------------|
|                                    | breast cancer; myeloma; bowel cancer; prostate cancer; neuroendocrine tumours (NET); ovarian cancer; skin disorders; skin cancers and melanomas; brain tumour; gastrointestinal (GI) cancer; cervical cancer; blood cancer; lung cancer; asbestosis & mesothelioma; upper GI cancers; oncofertility       |
| Carers                             |                                                                                                                                                                                                                                                                                                           |
| Children                           | children with serious illness; poor children; children; children's critical injury; children with disabilities                                                                                                                                                                                            |
| CVD                                | heart disease; pulmonary hypertension; stroke; arrhythmias; atherosclerosis; familial hypercholesterolemia; cardiovascular disease; diabetes and obesity                                                                                                                                                  |
| Disabilities                       |                                                                                                                                                                                                                                                                                                           |
| Drug users                         |                                                                                                                                                                                                                                                                                                           |
| Diabetes                           | diabetes; Type 1 diabetes; paediatric endocrinology                                                                                                                                                                                                                                                       |
| Epilepsy                           | epilepsy; epilepsy and other seizure disorders                                                                                                                                                                                                                                                            |
| Eye health                         | macular disease; glaucoma; eye health                                                                                                                                                                                                                                                                     |
| Gastrointestinal diseases          | IBD; GI diseases                                                                                                                                                                                                                                                                                          |
| HIV/AIDS                           | HIV/AIDS; HIV; viral hepatitis; STIs                                                                                                                                                                                                                                                                      |
| Infectious diseases                | meningococcal disease; polio; meningitis; herpes                                                                                                                                                                                                                                                          |
| Infertility                        |                                                                                                                                                                                                                                                                                                           |
| Kidney disease                     | kidney disease; renal failure                                                                                                                                                                                                                                                                             |
| Liver disease                      | hepatitis B and hepatitis C; hepatitis; liver disease; hepatology research; liver health                                                                                                                                                                                                                  |
| Men's health                       | men's health; erectile dysfunction                                                                                                                                                                                                                                                                        |
| Mental and behavioural disorders   | mental illness; mental health; ADHD; schizophrenia; mental illness; intellectual disabilities                                                                                                                                                                                                             |
| Miscellaneous                      | health consumer advocacy                                                                                                                                                                                                                                                                                  |
| Musculoskeletal                    | arthritis; musculoskeletal conditions; arthritis and related conditions; osteoporosis; Ankylosing Spondylitis; Arthritis and Uveitis; bone and mineral metabolism; myositis                                                                                                                               |
| Nervous system                     | multiple sclerosis ; Parkinson's; motor neurone disease (MND); benign essential blepharospasm; movement disorders; multiple sclerosis and other neurological conditions; dystonia; inflammatory neuropathies                                                                                              |
| Organ donation and transplantation |                                                                                                                                                                                                                                                                                                           |
| Pain                               | pain; chronic pain                                                                                                                                                                                                                                                                                        |
| Palliative care                    |                                                                                                                                                                                                                                                                                                           |
| Rare genetic disorders             | rare diseases; pompe disease; rare conditions of the pituitary gland; cystic fibrosis; hereditary angiodema; Fabry disease; primary immune deficiencies; mucopolysaccharidoses (MPSs) and related diseases; rare genetic disorders; Prader-Willi syndrome; Inborn errors of metabolism; lysosomal storage |

|                    |                                                                                                                                              |
|--------------------|----------------------------------------------------------------------------------------------------------------------------------------------|
|                    | diseases; tuberous sclerosis complex; Turner syndrome; Alpha-1 antitrypsin Deficiency; congenital adrenal hyperplasia; mitochondrial disease |
| Respiratory system | asthma; lung disease                                                                                                                         |
| Skin diseases      | scleroderma; burn injury; psoriasis                                                                                                          |
| Thyroid disorders  |                                                                                                                                              |
| Women's health     |                                                                                                                                              |
